1 **Increased reproductive tract infections among secondary school girls**  
2 **during the COVID-19 pandemic: associations with pandemic related**  
3 **stress, mental health, and domestic safety**

4 <sup>1,2</sup>Supriya D. Mehta, <sup>2</sup>Debarghya Nandi, <sup>3</sup>Fredrick Otieno, <sup>4</sup>Garazi Zulaika, <sup>5</sup>Elizabeth  
5 Nyothach, <sup>3</sup>Walter Agingu, <sup>2</sup>Runa Bhaumik, <sup>4</sup>Linda Mason, <sup>4</sup>Anna Maria van Eijk, <sup>4</sup>Penelope A  
6 Phillips-Howard

7 <sup>1</sup> Division of Infectious Diseases, Department of Medicine, Rush University College of Medicine,  
8 Chicago, IL, USA

9 <sup>2</sup> Division of Epidemiology & Biostatistics, School of Public Health, University of Illinois Chicago,  
10 Chicago, IL, USA

11 <sup>3</sup> Nyanza Reproductive Health Sciences, Kisumu, Kenya

12 <sup>4</sup> Department of Clinical Sciences, Liverpool School of Tropical Medicine, Liverpool, UK

13 <sup>5</sup> Kenya Medical Research Institute, Kisumu, Kenya

14

15 **Corresponding Author: Dr. Supriya Mehta ([Supriyad@uic.edu](mailto:Supriyad@uic.edu); [Supriya\\_Mehta@rush.edu](mailto:Supriya_Mehta@rush.edu))**

16 **Keywords: COVID-19<sup>1</sup>, Reproductive tract infections<sup>2</sup>, Bacterial vaginosis<sup>3</sup>, Sexually**  
17 **transmitted infections<sup>4</sup>, adolescent girls and young women<sup>5</sup>, Kenya<sup>6</sup>, cohort<sup>7</sup>, mediation<sup>8</sup>.**

18 **Funding:** This study was supported by the National Institutes of Health Eunice Shriver National  
19 Institute of Child Health and Human Development (R01HD093780 and R01HD106822 to SDM),  
20 and the Joint Global Health Trials Initiative (UK-Medical Research Council/ Department for  
21 International Development/ Wellcome Trust/Department of Health and Social Care; MR/N006046/1  
22 to PPH). The funders had no role in the design of the study, the collection, analysis, and  
23 interpretation of data, or in writing the manuscript.

24

25 **Abstract**

26 **Background:** Kenya, like many countries, shuttered schools during COVID-19, with subsequent  
27 increases in poor mental health, sexual activity, and pregnancy. We sought to understand how the  
28 COVID-19 pandemic may mediate risk of reproductive tract infections. We hypothesized that greater  
29 COVID-19 related stress would mediate risk via mental health, feeling safe inside the home, and  
30 sexual exposure, given the pandemic mitigation-related impacts of school closures on these factors.

31 **Methods:** We analyzed data from a cohort of 436 girls enrolled in secondary school in rural western  
32 Kenya. Baseline, 6-, 12-, and 18- month study visits occurred April 2018 – December 2019 (pre-  
33 COVID), and 30-, 36-, and 48- month study visits occurred September 2020 – July 2022 (COVID  
34 period). At study visits, participants self-completed a survey for sociodemographics and sexual  
35 practices, and provided self-collected vaginal swabs for Bacterial vaginosis (BV) testing, with STI  
36 testing at annual visits. COVID-related stress was measured with a standardized scale and  
37 dichotomized at highest quartile. Mixed effects modeling quantified how BV and STI changed over  
38 time, and longitudinal mediation analysis quantified how the relationship between COVID-19 stress  
39 and increased BV was mediated.

40 **Findings:** BV and STI prevalence increased from 12.1% and 10.7% pre-COVID to 24.5% and 18.1%  
41 during COVID, respectively. This equated to a 26% (95% CI 1.00 – 1.59) and 36% (95% CI 0.98 –  
42 1.88) increased relative prevalence of BV and STIs, respectively, in the COVID-19 period compared  
43 to pre-COVID, adjusted for numerous sociodemographic and behavioral factors. Higher COVID-  
44 related stress was associated with elevated depressive symptoms and feeling less safe inside the  
45 home, which were each associated with increased likelihood of having a boyfriend. In longitudinal  
46 mediation analyses, the direct effect of COVID-related stress on BV was small and non-significant,  
47 indicating increased BV was due to the constellation of factors that were impacted during the  
48 COVID-pandemic.

49 **Conclusions:** In this cohort of adolescent girls, BV and STIs increased following COVID-related  
50 school closures. These results highlight modifiable factors to help maintain sexual and reproductive  
51 health resiliency, such as anticipating and mitigating mental health impacts, domestic safety  
52 concerns, and maintaining sexual health services to prevent and treat reproductive tract infections.

53

## 54 1. INTRODUCTION

55 The World Health Organization (WHO) declared the end of the COVID-19 pandemic as a public  
56 health emergency on May 5, 2023. To help stem the initial impact of COVID-19, Kenya, like many  
57 countries around the world, shuttered schools on March 16, 2020, and put in place restrictions and  
58 curfews related to travel and social distancing [1]. Schools were partially reopened on October 19,  
59 2020, and fully reopened on January 4, 2021. The closure of schools, curfews, and restrictions on  
60 travel and public gatherings were costly to the economy and disruptive to the social fabric of  
61 Kenyans. The World Bank reported an estimated 2 million Kenyans were newly forced into poverty  
62 due to the pandemic [2]. The tangible impacts of the economic decline led to increases in job loss and  
63 food insecurity, especially during the first 6 months of the pandemic, and this fall-out extended to  
64 many low- and middle- income countries [3].

65 During the school closures, there were increases in adolescent pregnancy observed in our cohort of  
66 secondary schoolgirls in western Kenya [4]. Among these secondary schoolgirls, the pandemic  
67 period was associated with a 3-fold higher risk of school dropout relative to pre-COVID-19 learners.  
68 This was a global phenomenon; school closures due to COVID-19 led to permanent school dropout  
69 stemming from exacerbated and expanded poverty, added responsibilities of employment, domestic  
70 work, and childcare, and pregnancy and marriage [5]. In meta-analyses of worldwide data, there were  
71 increases in depressive symptoms and anxiety among children and adolescents, with greater  
72 prevalence and severity seen among girls and older children [6,7]. Evidence also emerged showing  
73 increases in sexual offenses against children coincident with lockdowns, curfews and school closures  
74 [8].

75 Information is emerging on the impact of the COVID-19 pandemic on rates of sexually transmitted  
76 infections (STIs), which disproportionately affect adolescent girls and young women. While there  
77 were some decreases in STIs during the initial lockdown phases likely due to underreporting and  
78 limited access to services [9,10], STIs rebounded at increasing rates over the pre-COVID period in  
79 the United States [11,12], China [13], and Spain [14]. Maintaining reproductive tract health is a  
80 public health and clinical priority. Bacterial vaginosis (BV) increases the risk of HIV acquisition 1.6-  
81 fold [15] and non-ulcerative STIs increase the risk of HIV acquisition 3- to 5- fold [16]. This is  
82 especially relevant in western Kenya, where the prevalence of HIV in the general adult population  
83 ranges from 16% (Kisumu County) to 21% (Siaya County) [17]. BV and STIs are also associated  
84 with increased risk of adverse pregnancy outcomes, such as preterm birth and premature rupture of  
85 membranes [18], which already occur at increased rates among adolescent and young women  
86 (AGYW) [19].

87 In this analysis, we describe how the prevalence of reproductive tract infections changed in a cohort  
88 of Kenyan secondary schoolgirls from before to during and after the COVID-19 pandemic. We also  
89 sought to understand how the COVID-19 pandemic could mediate subsequent risk of reproductive  
90 tract infections. We hypothesized that greater COVID-19 related stress would mediate risk via mental  
91 health, safety in the home, and sexual exposure, given the pandemic mitigation-related impacts of  
92 school closures on these factors. Quantifying the extent to which these factors contribute to  
93 reproductive tract infection risk can help with decision-making around intervention development and  
94 prioritization.

## 95 2. METHODS

96 This study was approved by the institutional review boards of the Kenya Medical Research Institutes  
 97 Scientific Ethics Review Unit (KEMRI, SERU #3215), Maseno University Ethics Review  
 98 Committee (MUERC, MSU/DRPI/MUERC/01021/21), (Liverpool School of Tropical Medicine  
 99 (LSTM, #15-005), and University of Illinois at Chicago (UIC, #2017-1301). Written informed  
 100 consent was obtained for all participants, with written assent and guardian consent obtained for non-  
 101 emancipated minors.

## 102 2.1 Study Design and Participants

103 Data for this analysis came from the Cups and Community Health (CaChE) study [20,21], a sub-set  
 104 of participants within the Cups or Cash for Girls (CCG) trial (ClinicalTrials.gov NCT03051789). The  
 105 CCG trial has been described in detail [22]. Briefly, CCG was a cluster-randomized controlled trial in  
 106 which secondary schools were randomized into 4 arms (1:1:1:1): (1) provision of menstrual cups  
 107 with training on safe cup use and care; (2) conditional cash transfer (CCT) based on  $\geq 80\%$  school  
 108 attendance in previous term; (3) menstrual cup and CCT; and (4) usual practice. For the CaChE  
 109 study, we enrolled approximately 20% of girls in the cup only and control arms of the CCG trial. The  
 110 CaChE study was powered to detect a 25% reduced relative prevalence of BV for the cup arm  
 111 compared to the control arm, over 6 study visits. After enrollment, CaChE participants were followed  
 112 every 6 months through 30 months for the trial analysis [20] (Figure 1). The 24-month study visit  
 113 scheduled to occur May 2020 was missed due to the COVID-19 pandemic. The 42-month visit was  
 114 missed due to a gap in funding.

115 **Figure 1. Timeline of CaChE Study Visits.**

| Original Study Timeline                                            |                                 |                                  |                                  |                 | Extension                            | New Follow-Up                    |                    |                                 |  |
|--------------------------------------------------------------------|---------------------------------|----------------------------------|----------------------------------|-----------------|--------------------------------------|----------------------------------|--------------------|---------------------------------|--|
|                                                                    |                                 |                                  |                                  |                 | COVID-19                             |                                  |                    |                                 |  |
| Schools Open                                                       |                                 |                                  |                                  | Schools Closed  | Community Visits                     |                                  |                    |                                 |  |
| Baseline<br>May 2 –<br>July 6<br>2018                              | 6M<br>Oct 1 –<br>Nov 12<br>2018 | 12M<br>May 8 –<br>May 28<br>2019 | 18M<br>Oct 3 –<br>Oct 24<br>2019 | 24M<br>May 2020 | 30M*<br>Sep 30 –<br>Feb 7<br>2020-21 | 36M<br>Apr 27 –<br>Jul 1<br>2021 | 42M<br>Oct<br>2021 | 48M<br>Apr 5 –<br>Jul 1<br>2022 |  |
| Number of participants followed up with BV test results available: |                                 |                                  |                                  |                 |                                      |                                  |                    |                                 |  |
| N=436                                                              | N=424<br>(97.2%)                | N=395<br>(90.6%)                 | N=398<br>(91.3%)                 | <b>MISSED</b>   | N=395<br>(90.6%)                     | N=329<br>(75.5%)                 | <b>MISSED</b>      | N=364<br>(83.5%)                |  |

116

117 **Legend:** Baseline began May 2018, and study visits took place at schools every 6 months through  
 118 October 2019 (18-month visit). The 24-month planned endline visit was cancelled due to COVID-19  
 119 restrictions and school closures. As schools were closed, we conducted the 30-month visit in the  
 120 community, as were subsequent study visits due to participants completing school. With careful  
 121 rebudgeting, we extended follow-up to 36-months, to continue capturing COVID-19 related impacts.  
 122 At the 36-month visit, specimens were obtained from 329 participants; an additional 58 participants  
 123 who had relocated were followed-up by telephone as the funding available did not support travel  
 124 outside the area. Subsequent funding allowed for follow-up for all participants, including those who  
 125 left the study area. \*Due to COVID-19 precautions which limited the number of persons able to  
 126 gather, the study period for the 30-month visit was extended, with 372 participants completed  
 127 between September 30 – December 18, 2020, and an additional 25 participants between January 15 –  
 128 February 7, 2021.

## 129 2.2 Data Collected

130 At each study visit, participants undertook a self-completed survey that collected information on  
131 sociodemographics, sexual practices, mental health, and menstrual practices. Participants were asked  
132 if they were sexually active in the past 6 months, and if they had been coerced or tricked to have sex  
133 in the past 6 months. Transactional sex was assessed through a series of questions that assessed sex in  
134 exchange for things (e.g., pads, money, school fees) or treatment (e.g., favors, employment). Girls  
135 were asked their marital status at each visit. Among those who reported being sexually active, they  
136 were asked whether it was with a boyfriend, husband, or partner. At the 18-month study visit, a  
137 separate question was added asking if participants were sexually active with someone who they  
138 consider to be a boyfriend, partner or husband in the past 6 months, and this variable was used for the  
139 18-month visit onwards. Few participants reported being married until the 48-month visit (Table 1)  
140 and thus the variable used for analysis is referred to as having a “boyfriend” for simplicity. At the 12-  
141 , 30-, 36-, and 48- month visits, depressive symptoms were assessed using the 9-item Personal Health  
142 Questionnaire (PHQ-9); scores were dichotomized at 5 or higher for analyses, reflecting mildly  
143 elevated depressive symptoms [23]. The 12-month visit PHQ-9 score was applied at the baseline, 6-,  
144 and 18- month visits for longitudinal modeling due to lack of measure at these time points. Domestic  
145 safety was assessed at each time point during the COVID-19 period with a single question: “Since  
146 the curfews and school closures due to COVID-19, do you feel more safe or less safe inside your  
147 home?” with responses of “Less safe”, “The same”, “More safe”. For analysis, responses were  
148 dichotomized as “Less safe” vs. “The same or more safe”.

149 Socioeconomic status at baseline was measured using questions related to household possessions, as  
150 reported in [24]. To reduce participant burden and for relevance to menstrual hygiene, only latrine  
151 type and water source used at home were asked at each subsequent 6 month visit and served as proxy  
152 for socioeconomic status (SES) as a time-updated measure. Latrine type was scaled 1 to 4 points  
153 (bush/field = 1, traditional pit = 2, improved pit = 3, flush toilet = 4) and water source was scaled 1 to  
154 4 points (surface water = 1, borehole = 2, rainwater = 3, piped water = 4) for a total of 8 points, with  
155 higher score reflecting greater improvement. This proxy SES score was dichotomized at 3 or less  
156 (lower) vs. 4 to 8 (higher). As compared to baseline SES using the more comprehensive assessment  
157 of household possessions, 79% of participants with higher proxy SES (4 to 8 score) also had higher  
158 SES by full assessment, and 42% of those with lower proxy SES (2-3 score) had lower SES by full  
159 assessment (tetrachoric rho = 0.54). School level water, sanitation, and hygiene (WASH) score at  
160 baseline was measured using previously described methods [23]; though schools were closed during  
161 the COVID-19 pandemic, this cluster-level variable was retained due to its relevance to area-level  
162 SES.

163 *COVID-related stress*: Stress related to the COVID-19 pandemic and mitigation measures was  
164 assessed at the 30-, 36-, and 48-month visits using 8 questions covering physical and emotional  
165 reaction domains related to COVID-19 specific psychological distress [25]. These questions ask  
166 about changes in physical (e.g., sleeping, concentrating) and emotional experiences (e.g., feelings of  
167 anxiousness, worry). Response categories were simplified from five categories to “Agree”, “Don’t  
168 know/Not Sure”, and “Disagree”. COVID-related stress score was calculated by assigning 2 points  
169 per question if the participant agreed, 1 point if participants responded “Don’t know/Not sure”  
170 response, and 0 if participants disagreed. The frequency distribution of responses to individual items  
171 over time are in Supplemental Table 1. Cronbach’s alpha was 0.87 (30-month), 0.86 (36-month), and  
172 0.90 (48-month).

173 *BV and STI Testing and Treatment:* At baseline and each 6-month study visit, participants were asked  
174 to take self-collected vaginal swabs to test for BV and STIs, as detailed previously [20]. BV testing  
175 was done at each 6-month visit, and STI testing was conducted at baseline, 12-, 30-, and 48-  
176 month visits. Self-collected swabs for BV were immediately smeared on glass slides by the study staff and  
177 checked for sufficiency by a laboratory technician in the field. Slides were transported to the  
178 laboratory and gram stained, followed by Nugent's scoring for detection of BV (Nugent score 7-10)  
179 [26]. Infection with *Neisseria gonorrhoeae* (NG) and *Chlamydia trachomatis* (CT) were assessed via  
180 nucleic acid amplification test (GeneXpert, Cepheid, Sunnydale, California, United States) and  
181 *Trichomonas vaginalis* (TV) by rapid immunochromatographic assay (OSOM TV antigen detection  
182 assay (Sekisui, Lexington, MA, US). All participants were provided results, and those who tested  
183 positive for BV or STIs were offered antibiotic treatment, regardless of symptoms.

## 184 **2.3 Statistical Analysis**

185 This analysis had two components: (1) mixed effects modeling to quantify how BV and STI changed  
186 from the pre- and post- COVID periods, and (2) longitudinal mediation analysis to explain how the  
187 relationship between COVID-19 stress and increased risk of BV was mediated. Due to minimal  
188 missing data, analyses were conducted as complete case.

### 189 *2.3.1. Change in BV and STIs from Before to During COVID-19*

190 BV (Nugent score 7-10 vs. 0-6) is used as the primary outcome due to availability at all study visits  
191 (except the 24 months missed visit) and for high correlation with sexual activity [21]. We examined  
192 the change in BV over time using generalized linear mixed effects models with Poisson distribution,  
193 with random effects for participant and cluster (school) and robust variance estimate. We examined  
194 the prevalence ratio of BV during the COVID-19 period (visits 30- through 48- months) as compared  
195 to pre-COVID (baseline through 18- months), and multivariable models adjusted for intervention  
196 status and *a priori* confounders [20]: baseline STI status, age, socioeconomic status, PHQ-9, and  
197 reports of having a boyfriend and engaging in transactional sex. As a secondary analysis, STIs were  
198 modeled using mixed effects models as described above. Mixed effects models were conducted in  
199 Stata/SE v17 (College Station, TX).

### 200 *2.3.2 Longitudinal mediation model*

201 We conducted longitudinal mediation analysis to test our hypotheses that greater COVID-related  
202 stress mediated elevated depressive symptoms and feeling less safe inside the home, which in turn  
203 mediated the proximal exposure, of having a boyfriend (Figure 2). The variable "sexually active"  
204 itself was not included in the model, since it is in the causal pathway for STIs, and often for BV. The  
205 outcome for analysis was BV, as STI was measured only at annual study visits. We controlled for  
206 assigned intervention status as a known factor associated with BV [20], socioeconomic status and age  
207 as level 1 confounders (Figure 2), and engaging in transactional sex as a level 2 confounder (Figure  
208 2). The mediation approach differs from multivariable adjustment (approach 1, above), in that the  
209 independent variable (COVID-related stress) is proposed to *influence* the mediator variables  
210 (depressive symptoms, domestic safety, having a boyfriend), which in turn influences the dependent  
211 variable (BV). In this way, the mediator variables seek to clarify *how* the independent and dependent  
212 variables are related.

213

214 **Figure 2. Conceptual model showing hypothesized linkages between COVID-related stress and**  
215 **Bacterial vaginosis.**

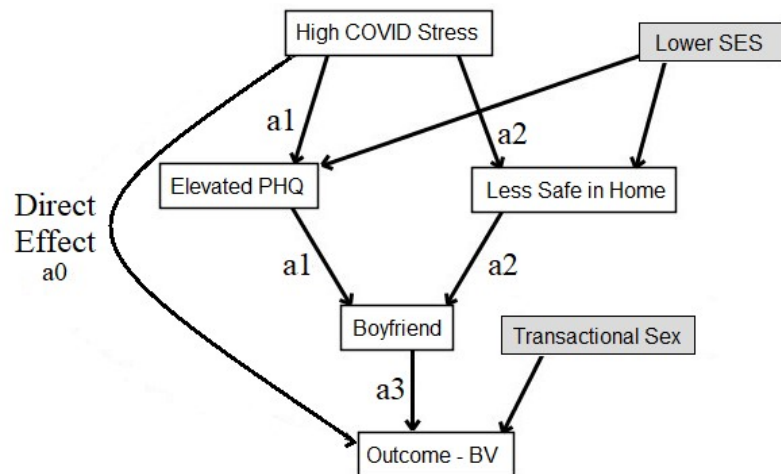

216

217 **Legend:** The hypothesized relationship between elevated COVID-related stress and BV (*direct*  
218 *effect, a0*) is depicted with pathways being mediated through level 1 mediators (*a1* elevated  
219 depressive symptoms (PHQ-9  $\geq 5$ ) and *a2* feeling less safe inside the home compared to before the  
220 COVID pandemic) and level 2 mediator *a3* having a boyfriend. We hypothesized socioeconomic  
221 status confounded the association between elevated COVID-related stress and increased depressive  
222 symptoms and feeling less safe inside the home. We also hypothesized that transactional sex  
223 confounded the association between elevated COVID-related stress and BV. Assigned intervention  
224 status (menstrual cup arm or control arm) and participant age were also controlled for and are not  
225 depicted in the figure.

226 The longitudinal mediation analysis decomposed the overall impact of higher COVID-related stress  
227 on the risk of getting BV into multiple distinct pathways using a counterfactual framework for  
228 mediation [27,28]. We defined a generalized marginal structural model for nested counterfactuals  
229 where we directly parameterized each of the indirect effect pathways (Figure 2) through four distinct  
230 pathways: the *direct effect*, and indirect pathways *a1*, *a2*, and *a3*. The *a1* pathway encompasses all  
231 potential pathways involving elevated depressive symptoms (PHQ-9  $\geq 5$ ), while *a2* encompasses  
232 those associated with feeling less safe at home compared to prior to the COVID-19 pandemic. Lastly,  
233 *a3* captures the influence of having a boyfriend on the outcome, BV. We derived parameter estimates  
234 of the direct and the indirect effects by regressing BV on COVID-19 related stress (the exposure) as  
235 well as all the other possible pathways, using a weighted approach and incorporating random  
236 intercepts [29]. Causal mediation analysis with a non-rare binary outcome often introduces some  
237 ambiguity due to the non-collapsibility of odds ratio, and we address this challenge using a log linear  
238 model with robust bootstrapping for standard error estimation [30]. We also report percentage of  
239 mediation effect. Longitudinal mediation was conducted in R (v4.1.13).

### 240 3. RESULTS

241 At baseline, participants were median age 16.9 years and were median age 21.0 years at the 48-  
242 month visit, in keeping with the 4-year span of time (Table 1). The proportion of participants  
243 reporting having a boyfriend and being sexually active increased over time, especially at the 12-, 30-  
244 , and 48-month visits. At the 30-month visit, when schools largely remained closed and curfews were

245 still in place, over one-third (34.5%) of participants reported feeling less safe in their home as  
246 compared to before the COVID-19 pandemic and associated lockdowns; this decreased to 17.8% by  
247 the 48-month visit.

### 248 **3.1. Distribution of Covariates by COVID-Related Stress**

249 The median COVID-19 stress impact score was 10 at 30 months and remained similar across time  
250 points (Supplemental Table 1). There were higher rates of agreement with statements related to worry  
251 about getting infected with COVID, friend and family getting infected with COVID, or transmitting  
252 COVID to someone else, and lowest rates of agreement with difficulty sleeping, concentrating, and  
253 feeling overwhelmed.

### 254 **3.2. Increase in BV and STIs in the COVID-19 period as compared to the pre-COVID period**

255 Bacterial vaginosis increased from 11.2% at baseline to 14.1% at 18 months, and in the COVID-19  
256 period, increased to 22.2% at 30 months and 28.1% by 48 months (Figure 3). Similarly, STI  
257 prevalence increased from 9.9% at baseline to 11.6% at 12 months, rising to 16.2% at the 30-month  
258 and to 20.1% by the 48-month visit (Figure 3). At each timepoint during the COVID-19 period, the  
259 prevalence of BV was greater for participants with higher reported COVID-related stress, those with  
260 lower socioeconomic indicators, reports of having a boyfriend, engaging in transactional sex,  
261 elevated PHQ-9 score, and feeling less safe inside the home (Table 2). In multivariable mixed effects  
262 modeling, there was a 26% increased relative prevalence of BV in the COVID-19 period compared to  
263 pre-COVID (adjusted prevalence ratio [aPR] = 1.26; 95% CI: 1.00 – 1.59; Table 3), adjusted for  
264 assigned intervention status; baseline school-level WASH score, socioeconomic status, sexual  
265 activity, and STI status; and time-varying age, socioeconomic status, elevated PHQ-9 score, engaging  
266 in transactional sex, and having a boyfriend. Similarly, there was a 36% increased prevalence ratio of  
267 STI in the COVID-19 period compared to the pre-COVID period (aPR = 1.36; 95% CI: 0.98 – 1.88)  
268 (Table 3).

269



270 **Figure 3. Prevalence of BV and STIs over time before and during COVID-19.**

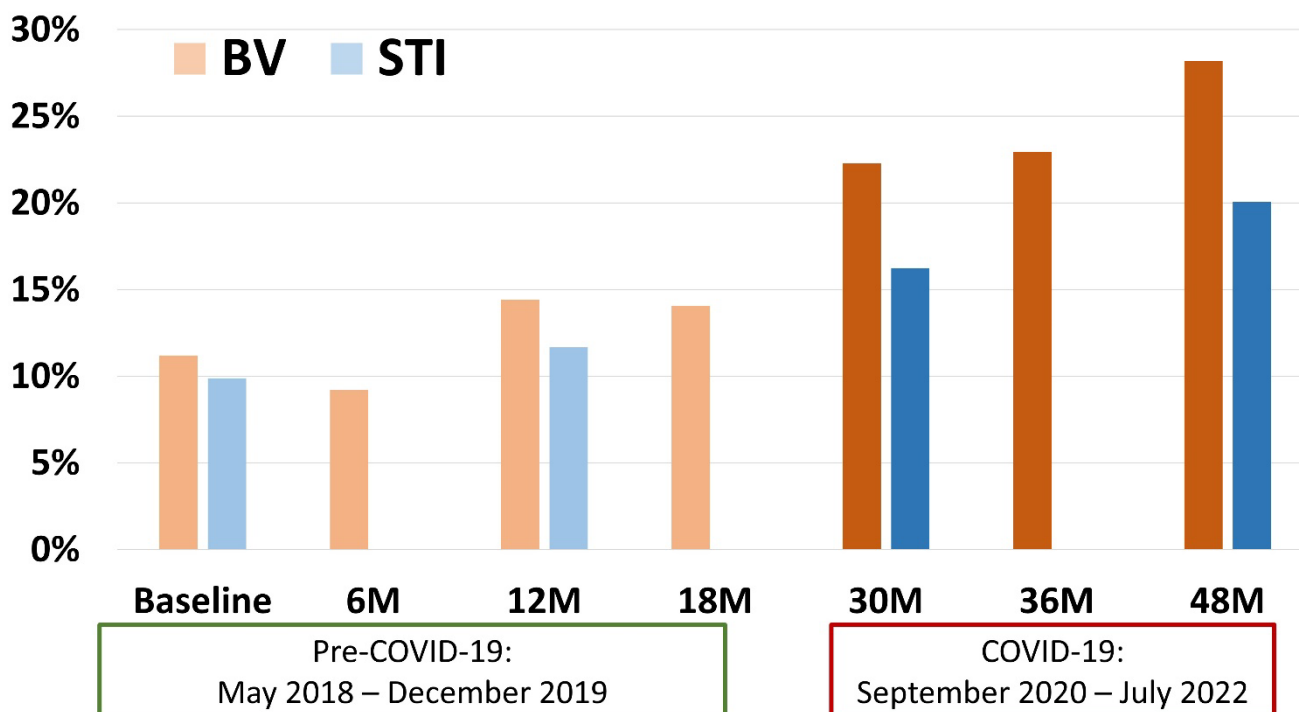

271

272 Legend: The y-axis shows the prevalence of BV (orange) and STIs (blue) over study visits (x-axis).  
273 The pre-COVID and COVID-19 periods are indicated with the dates underneath the x-axis and  
274 darker intensity of coloring in the visits occurring during the COVID-19 period.

### 275 3.3.Results of Mediation model

276 We hypothesized that stress related to COVID-19 could be mediating the increased prevalence of  
277 reproductive tract infection through depressive symptoms and domestic safety, both adversely  
278 affected by the pandemic and potentially related to increased likelihood of having a boyfriend and  
279 thus sexual exposure. To demonstrate the plausibility of the hypothesized relationships, the  
280 association between COVID-related stress and mediators was examined with mixed effects models.  
281 As shown in Table 4, feeling less safe inside the home compared to before the COVID-19 pandemic  
282 (aPR = 2.16; 95% CI: 1.74 – 2.68) was elevated among participants with highest quartile COVID-  
283 related stress score, adjusted for numerous baseline and time-varying covariates, though elevated  
284 depressive symptoms was not. Adjusted for the same numerous baseline and time-varying  
285 confounders, having a boyfriend (level 2 mediator) was statistically significantly increased with both  
286 level 1 mediators: elevated depressive symptoms (aPR = 1.20; 95% CI: 1.08 – 1.33) and feeling less  
287 safe inside the home compared to before COVID-19 (aPR = 1.21; 95% CI: 1.06 – 1.39), but was not  
288 associated with COVID-related stress. In longitudinal mediation analysis, AGYW who reported  
289 higher COVID-19 related stress had a non-significant 11% increased prevalence ratio of BV (Table  
290 5). Among the various pathways through which COVID-19 related stress could mediate the risk of  
291 BV, feeling less safe inside emerged as an important factor, contributing to 57.3% of the total effect.  
292 This was followed by the influence of having a boyfriend at 25.2%, and elevated depressive  
293 symptoms at 15.3%.

## 294 4. DISCUSSION

295 In this cohort of AGYW in western Kenya, the prevalence of BV and STIs increased over time, with  
296 greater increases observed during the period of COVID-19, immediately following school closures.  
297 The data captured in our cohort with time accruing before and during the COVID-19 pandemic  
298 enabled us to quantify this increase and evaluate reasons behind it. AGYW who were more greatly  
299 affected by the pandemic, as measured by COVID-related stress, were also more likely to report  
300 feeling less safe inside the home, and in turn, were more likely to have a boyfriend, which was  
301 proximal to having BV. Despite the association of these factors with increased COVID-related stress  
302 and with BV, and counter to our hypothesis, the direct effect of COVID-related stress on BV was  
303 small and non-significant, indicating the increased likelihood of BV was due to the constellation of  
304 factors that were impacted during the COVID-pandemic.

305 Having a boyfriend, the most proximal factor to BV and having greater likelihood of sexual  
306 exposure, may represent a coping mechanism in response to financial stress, feeling less safe in the  
307 home, or feelings of depression and anxiety. As reviewed in a study of sexual coping mechanisms  
308 during the COVID-19 pandemic, sexual connections and the intimacy entailed “can help cope with  
309 stressors and traumatic events” [31]. While not disaggregated by gender, the most frequently reported  
310 sexual strategies were sex as a source of pleasure and intimacy, to bond with and please a partner, to  
311 express care and strengthen the relationship, or to relieve stress and relax. A cross-sectional survey of  
312 Kenyan school going adolescents aged 13-19 living in Nairobi or the Coast region found high  
313 prevalences of anxiety (19.1%) and elevated depressive symptoms (19.1% with PHQ-9  $\geq$  10), as well  
314 as high mean scores for emotional and behavioral problems [32]. Mbithi et al. also observed that  
315 living in unsafe neighborhoods, being physically forced to have sex, and drinking alcohol were  
316 associated with increased odds of depressive symptoms and anxiety. In a mobile phone-based survey  
317 of 2,224 adult-adolescent (age 10-19 years) pairs from Kisumu, Nairobi, and Coastal region, 36% of  
318 adolescents reported depressive symptoms, and this was associated with adult loss of income, which  
319 in turn was associated with household tensions and violence [33]. We observed marginal significance  
320 of elevated depressive symptoms among those with higher COVID-19 related stress, and there are  
321 other dimensions of mental health that we did not measure. As we continue follow-up of these  
322 AGYW, we have incorporated expanded measures of stress and anxiety. Our qualitative work will  
323 incorporate questions related to what extent and how sexual relationships may be serving as a coping  
324 response to stress, and how these AGYW respond to and cope with stress more broadly. This may  
325 provide insight for future interventions to provide AGYW with healthy coping strategies.

326 Alternatively, having a boyfriend may represent increased sexual exposure through financial need or  
327 coercion. Our qualitative study involving focus groups with study participants and men in their  
328 communities provide further insight [34]. AGYW expressed that there were increased drivers for sex  
329 during the COVID-19 lockdowns, school closures, and restrictions: increased poverty with  
330 concomitant pressures for transactional sex, including from men, peers, and parents; boredom and  
331 freedom to visit boyfriends; COVID-19 restrictions and curfews that left them having to spend nights  
332 with boyfriends; greater competition for boyfriends, leading to more risk taking (e.g., having sex).  
333 Men expressed that providing material and financial support was helping adolescent girls and young  
334 women during the pandemic, and at the same time they had awareness that this enabled them a power  
335 differential in engaging girls to have sex or to have sex without condoms. In semi-structured in-depth  
336 interviews with 34 adolescent-caregiver dyads who had participated in the *Shamba Maisha*  
337 agricultural microfinance intervention in Kenya, AGYW receiving the intervention reported “no  
338 longer needing to engage in transactional sex or have multiple concurrent sexual partners as a way to  
339 meet their basic needs” [35]. Interviews revealed that girls felt less pressure for reciprocating for  
340 assistance with sex and that power differentials were reduced, by not having to rely on men for food  
341 and other needs. Although *Shamba Maisha* intervention took place prior to the pandemic, structural

342 interventions addressing underlying drivers of sexual risk taking may sustainably reduce AGYW  
343 vulnerability to economic disruptions, such as those brought by the COVID-19 pandemic.

344 Feeling less safe in the home compared to before the COVID-19 pandemic was elevated among  
345 AGYW reporting higher levels of COVID-related stress and was associated with increased  
346 prevalence of BV. As noted, worldwide there were increases in all forms of violence against women  
347 and girls (including domestic violence, gender-based violence, and sexual assault), and this has been  
348 named the “Shadow Pandemic” by UN Women [36]. The conditions of the pandemic, especially  
349 during initial lockdowns and longer lasting restrictions on movement, led to financial stress, isolation  
350 with abusers, tighter living quarters, reduced access to health care, police and justice, and social  
351 services. UN Women called for national responses that provide psychosocial support to survivors,  
352 expanded services (e.g., shelters, hotlines, counseling), and “strong messages” that violence against  
353 women and girls will be met with legal response [37]. The COVID-19 pandemic demonstrated there  
354 is need and opportunity for virtual applications to provide services [38], though the applicability of  
355 virtual services remains challenging for rural and other areas with pre-existing limited infrastructural  
356 resources for technology and confidentiality, and limited or non-existent access to in-person services.  
357 While we did not measure whether feeling less safe was physical, emotional, or sexual, results such  
358 as ours reflecting the downstream impacts of domestic safety on reproductive health of AGYW  
359 highlights the need to invest in and ensure these services are functionally in place prior to or shortly  
360 following the next population level crisis. Interventions that are more likely to have significant and  
361 sustained impact on preventing gender-based violence are not quick or easy solutions, such as  
362 community-based and school-based promotion of gender equality, transforming gender stereotypes  
363 and discriminatory norms, reforming discriminatory laws, ensuring women’s access to formal wage  
364 employment and education, and increasing women’s access to financial security [39]. As Mehta and  
365 Seeley have previously written [40], the progress in sexual and reproductive health of the past 30  
366 years is at critical juncture due to ongoing population level crises of pandemics, climate change, and  
367 conflict.

## 368 **Limitations**

369 The longitudinal multilevel mediation analysis with multiple mediators at each level is quite  
370 complex, particularly when dealing with binary as opposed to continuous mediators and outcomes.  
371 With limited work in this area, defining an appropriate model with assumptions that satisfies all the  
372 data constraints is challenging. Marginal structural modelling is an effective method when it comes  
373 to modeling sequential mediators, but there is limited work that implements time-varying multi-level  
374 mediation. For this reason, we were selective in our choice of mediators. Subsequent analyses will  
375 examine whether BV and STI risks changed in the post-COVID time period. We believe our findings  
376 may generalize to AGYW who attended secondary school and live in similar setting, but the impacts  
377 of the COVID-19 pandemic on reproductive tract infections and drivers of this among those who did  
378 not attend school or live in different settings may be different.

## 379 **Conclusions**

380 In this cohort of adolescent girls and young women, the prevalence of BV and STIs increased  
381 following school closures during the COVID-19 pandemic. Longitudinal analysis demonstrated that  
382 this increased risk was mediated by depressive symptoms and feeling less safe in the home, which  
383 led to increased likelihood of having boyfriends and thus sexual exposures. These results highlight  
384 specific modifiable factors that can be targeted by interventions during crises, to help maintain sexual  
385 and reproductive health resiliency in AGYW: mitigating mental health impacts and domestic safety

386 concerns. Our results also indicate further research is needed to elucidate the benefits and risks of  
387 relying on boyfriends and sex partners to cope with these stressors, and how these relationships may  
388 be leveraged as a resource.

389

## 390 **References**

- 391 1. Wangari EN, Gichuki P, Abuor AA, Wambui J, Okeyo SO, Oyatsi HT, et al. Kenya's  
392 response to the COVID-19 pandemic: a balance between minimising morbidity and adverse  
393 economic impact. *AAS Open Research*. 2021;4:3.
- 394 2. World Bank. Kenya Economic Update, November 2020: Navigating the Pandemic: World  
395 Bank; 2020.
- 396 3. Nechifor V, Ramos MP, Ferrari E, Laichena J, Kihui E, Omany D, et al. Food security and  
397 welfare changes under COVID-19 in Sub-Saharan Africa: Impacts and responses in Kenya. *Global  
398 food security*. 2021;28:100514.
- 399 4. Zulaika G, Bulbarelli M, Nyothach E, van Eijk A, Mason L, Fwaya E, et al. Impact of  
400 COVID-19 lockdowns on adolescent pregnancy and school dropout among secondary schoolgirls in  
401 Kenya. *BMJ Global Health*. 2022;7:e007666.
- 402 5. Kidman R, Breton E, Behrman J, Kohler H-P. Returning to school after COVID-19 closures:  
403 Who is missing in Malawi? *International Journal of Educational Development*. 2022;93:102645.
- 404 6. Deng J, Zhou F, Hou W, Heybati K, Lohit S, Abbas U, et al. Prevalence of mental health  
405 symptoms in children and adolescents during the COVID-19 pandemic: A meta-analysis. *Annals of  
406 the New York Academy of Sciences*. 2023;1520:53-73.
- 407 7. Racine N, McArthur BA, Cooke JE, Eirich R, Zhu J, Madigan S. Global prevalence of  
408 depressive and anxiety symptoms in children and adolescents during COVID-19: a meta-analysis.  
409 *JAMA pediatrics*. 2021;175:1142-50.
- 410 8. Stevens LM, Rockey JC, Rockowitz SR, Kanja W, Colloff MF, Flowe HD. Children's  
411 vulnerability to sexual violence during COVID-19 in Kenya: Recommendations for the future.  
412 *Frontiers in global women's health*. 2021;2:630901.
- 413 9. Crane MA, Popovic A, Stolbach AI, Ghanem KG. Reporting of sexually transmitted  
414 infections during the COVID-19 pandemic. *Sexually transmitted infections*. 2021;97:101-2.
- 415 10. Sentís A, Prats-Urbe A, López-Corbeto E, Montoro-Fernandez M, Nomah DK, de Olalla PG,  
416 et al. The impact of the COVID-19 pandemic on Sexually Transmitted Infections surveillance data:  
417 incidence drop or artefact? *BMC public health*. 2021;21:1-7.
- 418 11. Pinto CN, Niles JK, Kaufman HW, Marlowe EM, Alagia DP, Chi G, et al. Impact of the  
419 COVID-19 pandemic on chlamydia and gonorrhoea screening in the US. *American journal of  
420 preventive medicine*. 2021;61:386-93.

- 421 12. Tanne JH. Covid-19: Sexually transmitted diseases surged in US during pandemic. British  
422 Medical Journal Publishing Group; 2022.
- 423 13. Yan J, Li Y, Zhou P. Impact of COVID-19 pandemic on the epidemiology of STDs in China:  
424 based on the GM (1, 1) model. BMC Infectious Diseases. 2022;22:519.
- 425 14. Soriano V, Blasco-Fontecilla H, Gallego L, Fernández-Montero JV, de Mendoza C, Barreiro  
426 P. Rebound in sexually transmitted infections after the COVID-19 pandemic. AIDS reviews.  
427 2023;25.
- 428 15. Atashili J, Poole C, Ndumbe PM, Adimora AA, Smith JS. Bacterial vaginosis and HIV  
429 acquisition: a meta-analysis of published studies. AIDS (London, England). 2008;22:1493.
- 430 16. Wasserheit JN. Epidemiologies! Synergy: Interrelationships between Human  
431 Immunodeficiency Virus Infection and Other Sexually Transmitted Diseases. Sexually transmitted  
432 diseases. 1992;61-77.
- 433 17. Kenya Ministry of Health. Kenya HIV Estimates Report 2018. Programme NAaSC; 2018.
- 434 18. Juliana NC, Suiters MJ, Al-Nasiry S, Morr  SA, Peters RP, Ambrosino E. The association  
435 between vaginal microbiota dysbiosis, bacterial vaginosis, and aerobic vaginitis, and adverse  
436 pregnancy outcomes of women living in sub-Saharan Africa: a systematic review. Frontiers in public  
437 health. 2020;8:567885.
- 438 19. Althabe F, Moore JL, Gibbons L, Berrueta M, Goudar SS, Chomba E, et al. Adverse maternal  
439 and perinatal outcomes in adolescent pregnancies: The Global Network’s Maternal Newborn Health  
440 Registry study. Reproductive health. 2015;12:1-9.
- 441 20. Mehta SD, Zulaika G, Agingu W, Nyothach E, Bhaumik R, Green SJ, et al. Analysis of  
442 bacterial vaginosis, the vaginal microbiome, and sexually transmitted infections following the  
443 provision of menstrual cups in Kenyan schools: results of a nested study within a cluster randomized  
444 controlled trial. PLoS Medicine. 2023;20:e1004258.
- 445 21. Mehta SD, Zulaika G, Otieno FO, Nyothach E, Agingu W, Bhaumik R, et al. High prevalence  
446 of Lactobacillus crispatus dominated vaginal microbiome among Kenyan Secondary School Girls:  
447 Negative effects of poor quality menstrual hygiene management and sexual activity. Frontiers in  
448 Cellular and Infection Microbiology. 2021;11:716537.
- 449 22. Zulaika G, Nyothach E, van Eijk AM, Wang D, Opollo V, Obor D, et al. Menstrual cups and  
450 cash transfer to reduce sexual and reproductive harm and school dropout in adolescent schoolgirls in  
451 western Kenya: a cluster randomised controlled trial. EClinicalMedicine. 2023;65.
- 452 23. Kroenke K, Spitzer RL. The PHQ-9: a new depression diagnostic and severity measure. Slack  
453 Incorporated Thorofare, NJ; 2002. p. 509-15.
- 454 24. Zulaika G KD, Nyothach E, Wang D, Zielinski-Gutierrez E, Mason L, et al. Menstrual cups  
455 and cash transfer to reduce sexual and reproductive harm and school dropout in adolescent  
456 schoolgirls: study protocol of a cluster-randomised controlled trial in western Kenya. BMC Public  
457 Health. 2019;19:1317.

- 458 25. Schneider KE, Dayton L, Wilson D, Nestadt PS, Latkin CA. Distress in the time of COVID-  
459 19: Understanding the distinction between COVID-19 specific mental distress and depression among  
460 United States adults. *Journal of Affective Disorders*. 2021;294:949-56.
- 461 26. Nugent RP, Krohn MA, Hillier SL. Reliability of diagnosing bacterial vaginosis is improved  
462 by a standardized method of gram stain interpretation. *Journal of clinical microbiology*. 1991;29:297-  
463 301.
- 464 27. Imai K, Keele L, Tingley D. A general approach to causal mediation analysis. *Psychological*  
465 *methods*. 2010;15:309.
- 466 28. Vansteelandt S, Daniel RM. Interventional effects for mediation analysis with multiple  
467 mediators. *Epidemiology (Cambridge, Mass)*. 2017;28:258.
- 468 29. Lange T, Vansteelandt S, Bekaert M. A simple unified approach for estimating natural direct  
469 and indirect effects. *American journal of epidemiology*. 2012;176:190-5.
- 470 30. Valeri L, VanderWeele TJ. Mediation analysis allowing for exposure–mediator interactions  
471 and causal interpretation: theoretical assumptions and implementation with SAS and SPSS macros.  
472 *Psychological methods*. 2013;18:137.
- 473 31. Berdychevsky L. Sexual Coping Mechanisms During the COVID-19 Pandemic and Their  
474 Determinants of Use, Usefulness, and Effects on Sex Life. *Sexuality Research and Social Policy*.  
475 2023:1-24.
- 476 32. Mbithi G, Mabrouk A, Sarki A, Odhiambo R, Namuguzi M, Dzombo JT, et al. Mental health  
477 and psychological well-being of Kenyan adolescents from Nairobi and the Coast regions in the  
478 context of COVID-19. *Child and Adolescent Psychiatry and Mental Health*. 2023;17:63.
- 479 33. Pinchoff J, Friesen EL, Kangwana B, Mbushi F, Muluve E, Ngo TD, et al. How has COVID-  
480 19-related income loss and household stress affected adolescent mental health in Kenya? *Journal of*  
481 *adolescent health*. 2021;69:713-20.
- 482 34. Awiti E, Young S, Otieno F, Zulaika G, Nyothach E, Phillips-Howard PA, et al. ‘Whenever I  
483 help her, I am also expecting her vagina in return’: Men and adolescent girls perceived impacts of the  
484 COVID-19 pandemic on the sexual behaviour and health of adolescent girls in western Kenya.  
485 Submitted for publication. 2024.
- 486 35. Onono MA, Odhiambo G, Sheira L, Conroy A, Neilands TB, Bukusi EA, et al. The role of  
487 food security in increasing adolescent girls’ agency towards sexual risk taking: qualitative findings  
488 from an income generating agricultural intervention in southwestern Kenya. *BMC public health*.  
489 2021;21:1-11.
- 490 36. UN Women. The Shadow Pandemic: VIolence against women during COVID-19.
- 491 37. UN Women. COVID-19 and Essential Services Provision for Survivors of Violence Against  
492 Women and Girls. UN Women [Internet]. Available:  
493 [https://www.unwomen.org/sites/default/files/Headquarters/Attachments/Sections/Library/Publication](https://www.unwomen.org/sites/default/files/Headquarters/Attachments/Sections/Library/Publication%20s/2020/Brief-COVID-19-and-essential-services-provision-for-survivors-of-violence-against-women-and-girls-en.pdf)  
494 [s/2020/Brief-COVID-19-and-essential-services-provision-for-survivors-of-violence-against-women-](https://www.unwomen.org/sites/default/files/Headquarters/Attachments/Sections/Library/Publication%20s/2020/Brief-COVID-19-and-essential-services-provision-for-survivors-of-violence-against-women-and-girls-en.pdf)  
495 [and-girls-en.pdf](https://www.unwomen.org/sites/default/files/Headquarters/Attachments/Sections/Library/Publication%20s/2020/Brief-COVID-19-and-essential-services-provision-for-survivors-of-violence-against-women-and-girls-en.pdf). 'Accessed.'

- 496 38. Bouabida K, Lebouché B, Pomey M-P, editors. Telehealth and COVID-19 pandemic: an  
497 overview of the telehealth use, advantages, challenges, and opportunities during COVID-19  
498 pandemic. Healthcare; 2022: MDPI.
- 499 39. Gupta GR, Oomman N, Grown C, Conn K, Hawkes S, Shawar YR, et al. Gender equality and  
500 gender norms: framing the opportunities for health. The Lancet. 2019;393:2550-62.
- 501 40. Mehta SD, Seeley J. Grand challenges in adolescent sexual and reproductive health. Front  
502 Reprod Health. 2020:2:2.
- 503

504 **Table 1. Distribution of Participant Characteristics by Study Time Point**

| Calendar dates                                                                                                                 | May 2 – July 6, 2018  | Oct 1 – Nov 12, 2018           | May 8 – July 19, 2019 | Oct 3 – Oct 25, 2019  | Sept 30- Dec 18, 2019 (94%) | Apr 25- Jun 11, 2020            | Apr – Jul 2, 2022     |
|--------------------------------------------------------------------------------------------------------------------------------|-----------------------|--------------------------------|-----------------------|-----------------------|-----------------------------|---------------------------------|-----------------------|
| Variables <sup>1</sup>                                                                                                         | Baseline<br>N=436     | 6 Months <sup>1</sup><br>N=424 | 12 Months<br>N=395    | 18 Months<br>N=398    | 30 Months<br>N=395          | 36 Months<br>N=329 <sup>3</sup> | 48 Months<br>N=364    |
| Age median (IQR)                                                                                                               | 16.9<br>(16.1 – 17.9) | 17.4<br>(16.5-18.3)            | 17.9<br>(17.1 – 18.6) | 18.2<br>(17.4 – 19.2) | 19.4<br>(18.5 – 20.4)       | 20.0<br>(19.0-20.9)             | 21.0<br>(20.1 – 22.0) |
| Lower estimated socioeconomic status                                                                                           | 130 (30.5)            | 181 (49.3)                     | 172 (44.1)            | 160 (40.7)            | 152 (38.9)                  | 154 (47.1)                      | 146 (40.1)            |
| Has a boyfriend                                                                                                                | 25 (5.7)              | 15 (4.0)                       | 90 (23.0)             | 104 (26.4)            | 159 (40.4)                  | 135 (41.3)                      | 228 (62.5)            |
| Sexually active                                                                                                                | 144 (33.4)            | 67 (17.7) <sup>2</sup>         | 237 (60.5)            | 236 (59.9)            | 265 (67.8)                  | 226 (69.1)                      | 296 (81.1)            |
| Coerced or tricked into sex <sup>4</sup>                                                                                       | 103 (23.9)            | 28 (7.4)                       | 67 (17.4)             | 60 (15.2)             | 70 (17.8)                   | 62 (19.0)                       | 86 (24.0)             |
| Engaged in transactional sex <sup>4</sup>                                                                                      | 51 (11.9)             | 18 (4.8)                       | 46 (11.7)             | 36 (9.1)              | 52 (13.2)                   | 71 (18.4)                       | 63 (17.3)             |
| Used a condom for sex                                                                                                          | 110 (85.6)            | 55 (91.7)                      | 160 (74.4)            | 171 (77.0)            | 194 (84.7)                  | 196 (85.6)                      | 268 (82.7)            |
| Currently pregnant (self-report)                                                                                               | 3 (2.3)               | 2 (0.5)                        | 1 (0.3)               | 5 (1.3)               | 23 (9.4)                    | 19 (8.4)                        | 30 (8.2)              |
| Ever been pregnant                                                                                                             | 15 (3.4)              | NA                             | 16 (4.1)              | NA                    | 55 (22.6)                   | 60 (26.6)                       | 114 (31.2)            |
| Compared to before the COVID-19 pandemic, how has safety inside the home changed?                                              |                       |                                |                       |                       |                             |                                 |                       |
| Less safe                                                                                                                      | NA                    | NA                             | NA                    | NA                    | 136 (34.5)                  | 107 (27.9)                      | 65 (17.8)             |
| Same/no change                                                                                                                 |                       |                                |                       |                       | 97 (24.6)                   | 112 (29.2)                      | 148 (40.6)            |
| More safe                                                                                                                      |                       |                                |                       |                       | 161 (40.9)                  | 164 (42.8)                      | 152 (41.6)            |
| COVID-19 impact score: median (IQR)                                                                                            | NA                    | NA                             | NA                    | NA                    | 10 (6 – 14)                 | 10 (6-14)                       | 10 (6-16)             |
| COVID-19 impact score                                                                                                          |                       |                                |                       |                       |                             |                                 |                       |
| Highest quartile                                                                                                               | NA                    | NA                             | NA                    | NA                    | 121 (30.7)                  | 118 (30.7)                      | 138 (37.8)            |
| Lower quartiles                                                                                                                |                       |                                |                       |                       |                             |                                 |                       |
| PHQ-9, Mean (IQR)                                                                                                              | NA                    | NA                             | 2.87 (0 – 4)          | NA                    | 2.39 (0 – 3)                | 2.10 (0 – 3)                    | NA                    |
| Elevated PHQ-9 score $\geq 5$                                                                                                  | NA                    | NA                             | 85 (21.7)             | NA                    | 81 (20.6)                   | 56 (17.1)                       | NA                    |
| Bacterial vaginosis (Nugent score 7-10) <sup>5</sup>                                                                           | 49 (11.2)             | 39 (9.2)                       | 57 (14.4)             | 56 (14.1)             | 88 (22.2)                   | 75 (22.8)                       | 102 (28.0)            |
| Sexually transmitted infection (composite of chlamydia, gonorrhea, trichomoniasis)                                             | 43 (9.9)              | NA                             | 46 (11.6)             | NA                    | 64 (16.2)                   | NA                              | 73 (20.1)             |
| Proportion of STIs diagnosed in which the participant reports not having any sexual activity in the past 6 months <sup>5</sup> | 34.2%                 |                                | 31.8%                 |                       | 17.5%                       |                                 | 6.9%                  |

505 NA = Not Assessed



506 <sup>1</sup>Not all cells sum to N due to missing data. Missing data occurred in less than 1.6% of observations at any visit except at the 6-month visit, in which  
507 N=47 surveys were lost due to failed connection with server

508 <sup>2</sup>In abbreviating the 6-month survey from baseline, questions regarding sexual activity, transactional sex, and coerced sex were inadvertently removed,  
509 thus leading to likely substantial underestimate. These questions were re-introduced from the 12-month survey onwards.

510 <sup>3</sup>At the 36-month survey, 58 participants had relocated outside of the study area and were followed only by telephone, thus without BV results.

511 <sup>4</sup>Coerced/tricked into having sex, and transactional sex are among those who report being sexually active.

512 <sup>5</sup>Across all participants and visits, BV status was missing for 5 observations: one at 30 months, 2 at 37 months, and 2 at 48 months. Each occurred in  
513 different individuals, who all had multiple other observations of BV results in the pre- and post- COVID periods and were therefore maintained in  
514 analyses.

515 **Table 2. Distribution of COVID-19 related stress and hypothesized mediating factors by time**  
 516 **point and Bacterial vaginosis (BV) status.**  
 517

| Variables                                   | 30 Months, N=395      |                       | 36 Months, N=327      |                       | 48 Months, N=362      |                       |
|---------------------------------------------|-----------------------|-----------------------|-----------------------|-----------------------|-----------------------|-----------------------|
|                                             | No BV, N=307<br>n (%) | BV, N=88<br>n (%)     | No BV, N=252<br>n (%) | BV, N=75<br>n (%)     | No BV, N=260<br>n (%) | BV, N=102<br>n (%)    |
| <i>Baseline Covariates</i>                  |                       |                       |                       |                       |                       |                       |
| Intervention arm                            |                       |                       |                       |                       |                       |                       |
| Control                                     | 153 (75.7)            | 49 (24.3)             | 125 (73.5)            | 45 (26.5)             | 120 (65.9)            | 62 (34.1)             |
| Cups                                        | 154 (79.9)            | 39 (20.2)             | 127 (80.9)            | 30 (19.1)             | 140 (77.8)            | 40 (22.2)             |
| Socioeconomic status                        |                       |                       |                       |                       |                       |                       |
| Higher                                      | 214 (77.3)            | 63 (22.7)             | 181 (79.4)            | 47 (20.6)             | 184 (72.7)            | 69 (27.3)             |
| Lower                                       | 93 (78.8)             | 25 (21.2)             | 70 (71.4)             | 28 (28.6)             | 76 (69.7)             | 33 (30.3)             |
| Water, sanitation, and hygiene score (WASH) |                       |                       |                       |                       |                       |                       |
| Lower (0 – 1)                               | 129 (81.6)            | 29 (18.4)             | 95 (74.8)             | 32 (25.2)             | 103 (76.3)            | 32 (23.7)             |
| Higher (2)                                  | 178 (75.1)            | 59 (24.9)             | 157 (78.5)            | 43 (21.5)             | 157 (69.2)            | 70 (30.8)             |
| Sexually active                             |                       |                       |                       |                       |                       |                       |
| No                                          | 208 (80.3)            | 51 (19.7)             | 171 (79.9)            | 43 (20.1)             | 182 (77.8)            | 52 (22.2)             |
| Yes                                         | 96 (73.3)             | 35 (26.7)             | 78 (71.6)             | 31 (28.4)             | 75 (61.0)             | 48 (39.0)             |
| Missing                                     | 3                     | 2                     | 3                     | 1                     | 3                     | 2                     |
| STI status                                  |                       |                       |                       |                       |                       |                       |
| Negative                                    | 284 (79.4)            | 74 (20.7)             | 232 (78.6)            | 63 (21.4)             | 240 (73.6)            | 86 (26.4)             |
| Positive                                    | 23 (62.2)             | 14 (37.8)             | 20 (62.5)             | 12 (37.5)             | 20 (55.6)             | 16 (44.4)             |
| <i>Time-Varying Covariates</i>              |                       |                       |                       |                       |                       |                       |
| COVID-related stress                        |                       |                       |                       |                       |                       |                       |
| Lower quartiles                             | 216 (79.1)            | 57 (20.9)             | 171 (76.0)            | 54 (20.0)             | 168 (74.3)            | 58 (25.7)             |
| Highest quartile                            | 89 (74.2)             | 31 (25.8)             | 80 (79.2)             | 21 (20.8)             | 92 (67.6)             | 44 (32.4)             |
| Missing                                     | 2                     |                       | 1                     |                       |                       |                       |
| Socioeconomic status                        |                       |                       |                       |                       |                       |                       |
| Higher                                      | 193 (80.4)            | 47 (19.6)             | 140 (81.4)            | 32 (18.6)             | 158 (72.8)            | 59 (27.2)             |
| Lower                                       | 112 (73.7)            | 40 (26.3)             | 111 (72.1)            | 43 (27.9)             | 102 (70.8)            | 42 (29.2)             |
| Missing                                     | 2                     | 1                     | 1                     |                       |                       |                       |
| Median age (IQR)                            | 19.5<br>(18.5 – 20.5) | 19.3<br>(18.5 – 20.3) | 19.8<br>(19.0 – 20.8) | 20.2<br>(19.4 – 21.0) | 20.9<br>(20.1 – 21.9) | 21.2<br>(20.2 – 22.2) |
| Has a boyfriend                             |                       |                       |                       |                       |                       |                       |
| No                                          | 195 (83.0)            | 40 (17.0)             | 167 (87.0)            | 25 (13.0)             | 112 (82.8)            | 25 (18.2)             |
| Yes                                         | 110 (69.6)            | 48 (30.4)             | 84 (62.7)             | 50 (37.3)             | 148 (65.8)            | 77 (34.2)             |
| Missing                                     | 2                     |                       | 1                     |                       |                       |                       |
| Engaged in transactional sex                |                       |                       |                       |                       |                       |                       |
| No                                          | 270 (79.2)            | 71 (20.8)             | 213 (79.2)            | 56 (20.8)             | 219 (73.2)            | 80 (26.7)             |
| Yes                                         | 35 (67.3)             | 17 (32.7)             | 38 (66.7)             | 19 (33.3)             | 41 (65.1)             | 22 (34.9)             |
| Missing                                     | 2                     |                       | 1                     |                       |                       |                       |
| Depressive symptoms <sup>1</sup>            |                       |                       |                       |                       |                       |                       |

|                        |            |           |            |           |            |           |
|------------------------|------------|-----------|------------|-----------|------------|-----------|
| PHQ-9 <5               | 248 (79.5) | 60 (20.5) | 209 (77.4) | 61 (22.6) | 211 (73.0) | 78 (27.0) |
| PHQ-9 ≥ 5              | 57 (70.4)  | 24 (29.6) | 42 (75.0)  | 14 (25.0) | 43 (68.3)  | 20 (31.7) |
| Missing                | 2          |           | 1          |           | 6          | 4         |
| Safety inside the home |            |           |            |           |            |           |
| No change or more safe | 207 (80.2) | 51 (19.8) | 186 (78.8) | 50 (21.2) | 217 (73.1) | 80 (26.9) |
| Less safe              | 98 (72.6)  | 37 (27.4) | 64 (71.9)  | 25 (28.1) | 43 (66.1)  | 22 (38.9) |
| Missing                | 2          |           | 2          |           |            |           |

518 STI = sexually transmitted infection; composite of *C. trachomatis*, *N. gonorrhoeae*, *T. vaginalis*

519 IQR = Interquartile range

520 PHQ-9 = Personal Health Questionnaire 9-item

521

522 **Table 3. Results of crude and multivariable adjusted mixed effects modeling: Prevalence ratio**  
 523 **of Bacterial vaginosis and Sexually transmitted infections during COVID-19 as compared to**  
 524 **pre-COVID<sup>1</sup>.**

| <b>Bacterial vaginosis</b>                                                                                                                                    | <b>Crude</b><br><b>N= 2,738</b><br><b>PR (95% CI)</b> | <b>Adjusted<sup>2</sup></b><br><b>N=2,544</b><br><b>PR (95% CI)</b> |
|---------------------------------------------------------------------------------------------------------------------------------------------------------------|-------------------------------------------------------|---------------------------------------------------------------------|
| During COVID-19 period vs. Pre-COVID                                                                                                                          | 2.00 (1.62 – 2.48)                                    | 1.26 (1.00 – 1.59)                                                  |
| <b>Sexually transmitted infections</b><br>(composite of testing positive for any of:<br><i>C. trachomatis</i> , <i>N. gonorrhoeae</i> , <i>T. vaginalis</i> ) | <b>Crude</b><br><b>N= 1,587</b><br><b>PR (95% CI)</b> | <b>Adjusted<sup>3</sup></b><br><b>N=1,511</b><br><b>PR (95% CI)</b> |
| During COVID-19 period vs. Pre-COVID                                                                                                                          | 1.68 (1.40 – 2.02)                                    | 1.36 (0.98 – 1.88)                                                  |

525 PR = Prevalence Ratio; CI = Confidence Interval

526  
 527 <sup>1</sup>The Pre-COVID study visits of Baseline through 18- months took place May 2018 through October 2019.  
 528 Study visits at 30- through 48- months took place during the COVID-19 period, September 2020 through July  
 529 2022.

530 <sup>2</sup>Simultaneously adjusted for: Assigned intervention status; baseline water, sanitation, and hygiene score,  
 531 socioeconomic status, sexual activity, and STI status; and time-varying age, socioeconomic status, PHQ-9  
 532 score, engaging in transactional sex, and having a boyfriend.

533 <sup>3</sup>Simultaneously adjusted for: Assigned intervention status; baseline water, sanitation, and hygiene score,  
 534 socioeconomic status, sexual activity; and time-varying age, socioeconomic status, elevated PHQ-9 score,  
 535 engaging in transactional sex, and having a boyfriend.  
 536

537 **Table 4. Results of crude and multivariable adjusted mixed effects modeling: Prevalence Ratio**  
 538 **of Level 1 Mediators associated with elevated COVID-related stress.**

| Level 1 Mediators                                                     | Crude PR (95% CI)     | Adjusted for Longitudinal Mediation <sup>1</sup> PR (95% CI) | Fully Adjusted <sup>2</sup> PR (95% CI) |
|-----------------------------------------------------------------------|-----------------------|--------------------------------------------------------------|-----------------------------------------|
| <b>Elevated Depressive Symptoms: PHQ-9 greater than or equal to 5</b> | N=1,143               | N=1,084                                                      | N=1,069                                 |
| Highest quartile COVID-related stress vs. lower COVID-related stress  | 1.24<br>(0.86 – 1.80) | 1.25<br>(0.84 – 1.85)                                        | 1.11<br>(0.83 – 1.49)                   |
| <b>Feels less safe inside the home compared to before COVID-19</b>    | N=1,142               | N=1,083                                                      | N=1,069                                 |
| Highest quartile COVID-related stress vs. lower COVID-related stress  | 2.28<br>(1.79 – 2.19) | 2.27<br>(1.81 – 2.85)                                        | 2.16<br>(1.74 – 2.68)                   |
| Level 2 Mediator                                                      | Crude PR (95% CI)     | Adjusted for Longitudinal Mediation <sup>3</sup> PR (95% CI) | Fully Adjusted <sup>4</sup> PR (95% CI) |
| <b>Has a boyfriend</b>                                                | N=1,143               | N=1,083                                                      | N=1,069                                 |
| Highest quartile COVID-related stress vs. lower COVID-related stress  | 1.16<br>(1.01 – 1.35) | 1.02<br>(0.89 – 1.16)                                        | 0.98<br>(0.85 – 1.12)                   |
| Elevated depressive symptoms (PHQ $\geq$ 5 vs. <5)                    |                       | 1.20<br>(1.01 – 1.41)                                        | 1.20<br>(1.08 – 1.33)                   |
| Feels less safe inside the home during COVID-19 as compared to before |                       | 1.22<br>(1.03 – 1.45)                                        | 1.21<br>(1.06 – 1.39)                   |

539 All models, including crude models, are time-adjusted.

540 PR = Prevalence Ratio; CI = Confidence Interval

541 <sup>1</sup> Simultaneously adjusted for: Assigned intervention status and time, and level 1 confounders (time-varying  
 542 socioeconomic status and age).

543 <sup>2</sup> Simultaneously adjusted for: Assigned intervention status; baseline water, sanitation, and hygiene score,  
 544 socioeconomic status, sexual activity, and STI status; time and time-varying age, socioeconomic status,  
 545 elevated PHQ-9 score (for safety inside the home model), feels less safe inside the home (for depressive  
 546 symptoms model) engaging in transactional sex, and having a boyfriend.

547 <sup>3</sup> Simultaneously adjusted for: Assigned intervention status and time, level 1 confounders (time-varying  
 548 socioeconomic status and age), level 1 mediators (depressive symptoms, feeling safe inside the home), and  
 549 level 2 confounder (transactional sex).

550 <sup>4</sup> Simultaneously adjusted for: Assigned intervention status; baseline water, sanitation, and hygiene score,  
 551 socioeconomic status, sexual activity, and STI status; time, and time-varying age, socioeconomic status,  
 552 elevated PHQ-9 score, safe inside home, and engaging in transactional sex.

553

554

555 **Table 5. Results of crude and variable adjusted longitudinal pathway model: Prevalence Ratio**  
 556 **of Bacterial vaginosis (BV) for adolescent girls and young women with higher COVID-related**  
 557 **stress versus less stress, decomposed into multiple pathways.**

|                                                                                                                                   | <b>Crude Model PR Estimate</b> | <b>Longitudinal Pathway Model PR Estimate (95% CI)</b> | <b>Percentage of Mediation</b> |
|-----------------------------------------------------------------------------------------------------------------------------------|--------------------------------|--------------------------------------------------------|--------------------------------|
| <b>Direct Effect:</b> Elevated COVID-19 related stress and BV                                                                     | 1.11                           | 1.00 (0.91 – 1.09)                                     | 2.2%                           |
| <b>Indirect Effect (a1)</b><br>Association with BV mediated through elevated depressive symptoms (PHQ-9 $\geq$ 5)                 |                                | 1.02 (0.94 – 1.10)                                     | 15.3%                          |
| <b>Indirect Effect (a2)</b><br>Association with BV mediated through feeling less safe inside the home as compared to before COVID |                                | 1.06 (0.98 – 1.14)                                     | 57.3%                          |
| <b>Indirect Effect (a3)</b><br>Association with BV mediated through having a boyfriend                                            |                                | 1.03 (0.95 – 1.11)                                     | 25.2%                          |
| <b>Total Effect</b>                                                                                                               | 1.11                           | 1.11                                                   | 100%                           |

558 PR = Prevalence Ratio; CI = Confidence Interval based on Bootstrapped Standard Error.

559 The longitudinal mediation analysis decomposes the overall impact of higher COVID-related stress  
 560 on the risk of having BV, following relationships (*a1*, *a2*, *a3*) as hypothesized in Figure 2.
